# Supplementary material for: eHealth tools for the self-testing of visual acuity: a scoping review
Source: PubMed Central journal article supplement (PMC6706420; doi:10.1038/s41746-019-0154-5), 2019-08-22
Supplement: 41746_2019_154_MOESM1_ESM.pdf [file 41746_2019_154_MOESM1_ESM.pdf]

**Supplementary Table 1:** Survey items sent to developers of eHealth tools

| Section          | Topic                                                  | Question(s)                                                                                            |                                                                                                                                                                                                                                                     |
|------------------|--------------------------------------------------------|--------------------------------------------------------------------------------------------------------|-----------------------------------------------------------------------------------------------------------------------------------------------------------------------------------------------------------------------------------------------------|
| <b>Section 1</b> | General description of measure and measure development | Please enter a link or URL for your tool.                                                              |                                                                                                                                                                                                                                                     |
|                  |                                                        | Name of the tool                                                                                       |                                                                                                                                                                                                                                                     |
|                  |                                                        | Is your test available                                                                                 | Online<br>On an Android device<br>On an Apple device<br>Other (Please specify)                                                                                                                                                                      |
|                  |                                                        | Please provide a brief description of your test                                                        |                                                                                                                                                                                                                                                     |
|                  |                                                        | What visual functions does your test measure?                                                          | Distance Visual Acuity<br>Near Visual Acuity<br>Low Contrast Visual Acuity<br>Contrast Sensitivity<br>Central Visual Field<br>Binocular Vision<br>Refractive Correction<br>Colour Vision<br>Vision-Related Quality of Life<br>Symptom Questionnaire |
|                  |                                                        | Does your test include assessment of 'red flag' symptoms that could indicate serious visual pathology? | Yes<br>No<br>If yes, please provide details                                                                                                                                                                                                         |
|                  |                                                        | Is your test in the public domain/proprietary?                                                         |                                                                                                                                                                                                                                                     |
|                  |                                                        | If proprietary, please describe how to obtain access to the instrument.                                |                                                                                                                                                                                                                                                     |
| <b>Section 2</b> | Normative data                                         | Have normative data been collected for your test?                                                      | Yes<br>No                                                                                                                                                                                                                                           |

|                  |                                          |                                                                                                                                                    |                                                                                                                                                                                                                                                                         |
|------------------|------------------------------------------|----------------------------------------------------------------------------------------------------------------------------------------------------|-------------------------------------------------------------------------------------------------------------------------------------------------------------------------------------------------------------------------------------------------------------------------|
|                  |                                          |                                                                                                                                                    | If yes, please provide details of normative data (populations, relevant publications, tables, documents)                                                                                                                                                                |
| <b>Section 3</b> | Reliability, validity and responsiveness | Which, if any, of the following validity, reliability and responsiveness analyses have been undertaken with your test?                             | Sensitivity for detecting change over time<br>Convergence with similar tests<br>Convergence with tests of functional ability<br>Predictive validity<br>Sensitivity and/or specificity<br>Construct and face validity<br>Test-retest reliability<br>Internal consistency |
|                  |                                          | Please provide details of any analyses and relevant publications.                                                                                  |                                                                                                                                                                                                                                                                         |
|                  |                                          | Please describe the kind of feedback that the user receives upon completing the measure.                                                           |                                                                                                                                                                                                                                                                         |
| <b>Section 4</b> | Data collection and storage              | Can your test be completed by lay people without support from trained technicians or clinicians?                                                   | Yes<br>No                                                                                                                                                                                                                                                               |
|                  |                                          | What technology and hardware requirements are there for running your test?                                                                         |                                                                                                                                                                                                                                                                         |
|                  |                                          | How long does it take to complete your test in minutes?                                                                                            |                                                                                                                                                                                                                                                                         |
|                  |                                          | How are test results displayed, stored and transmitted?                                                                                            |                                                                                                                                                                                                                                                                         |
|                  |                                          | Are test results accessible in a real-time (or close to real-time manner)?                                                                         | Yes<br>No                                                                                                                                                                                                                                                               |
|                  |                                          | Does your data collection and storage system allow for the provision of real-time alerts regarding significant vision change, for use by the user? | Yes<br>No                                                                                                                                                                                                                                                               |

|                  |                                 |                                                                                                                                                                                                                                            |                                                                                                 |
|------------------|---------------------------------|--------------------------------------------------------------------------------------------------------------------------------------------------------------------------------------------------------------------------------------------|-------------------------------------------------------------------------------------------------|
|                  |                                 | If yes, who would receive that alert?                                                                                                                                                                                                      | The User<br>Caregivers or family members<br>The supervising clinician<br>Other (please specify) |
| <b>Section 5</b> | Quality assurance and approvals | Does your technology allow for any automation of quality assurance/ quality checking of data inputted by the user?                                                                                                                         | Yes<br>No<br>If yes, please describe                                                            |
|                  |                                 | Has your test been accepted by any health regulatory authorities (e.g. national regulatory authority, European Medicines Agency (EMA), US Food and Drug Administration (FDA)) as a valid measure for any particular disease entity?        | Yes<br>No<br>If yes, please describe.                                                           |
| <b>Section 6</b> | Availability and accessibility  | Are there any physical, cognitive or psychological restrictions that might limit test completion?                                                                                                                                          |                                                                                                 |
|                  |                                 | Are there any culturally or linguistically adapted test versions?                                                                                                                                                                          | Yes<br>No<br>If yes, please describe.                                                           |
| <b>Section 7</b> | Other information               | If you have any other comments about your tool that we did not cover in this survey, please list them below.<br><br>Please provide an email address that we might use to contact you should we have further questions regarding your tool. |                                                                                                 |
